# Supplementary material for: High precision, high throughput generation of droplets containing single cells
Source: Royal Society of Chemistry journal article supplement (doi:10.1039/d2lc00841f), 2022-01-01
Supplement: d2lc00841f2.pdf [file d2lc00841f2.pdf]

1  
2  
3  
4  
5  
6  
7  
8  
9  
10  
11  
12  
13  
14  
15  
16  
17  
18  
19  
20  
21  
22  
23  
24  
25  
26

## Supplementary Materials for

### High precision, high throughput generation of single cells containing droplets

Jiande Zhou<sup>1\*</sup>, Amaury Wei<sup>1</sup>, Arnaud Bertsch<sup>1</sup>, Philippe Renaud<sup>1\*</sup>

\*Corresponding author. Email: [jiande.zhou@epfl.ch](mailto:jiande.zhou@epfl.ch) ; [philippe.renaud@epfl.ch](mailto:philippe.renaud@epfl.ch)

#### This PDF file includes:

Supplementary Text  
Figures. S1 to S5  
Movie S1

#### Other Supplementary Materials for this manuscript include the following:

Movie S1

## 27 Supplementary text

### 28 Section 1: Chip Design and T junction geometrical rule

29 The overall chip design is shown in Fig. S1a, where blue dotted box highlights each functional  
30 unit. Four inlets are included (red). Inlets 1 & 2 introduce cell medium and oil (continuous  
31 phase) for droplet generation, inlet 3 (oil) is for droplet spacing and inlet 4 (oil) is for introducing  
32 pinching flow for PFF operation. The oil inlets have a filter structure at the entrance to avoid  
33 debris into the system. There are five main outlets, the bottom one is for single cell droplet  
34 collection. It is critical to add the resistive meanders at the end of each outlet, to ensure the  
35 sorting stability. A short bypass outlet (yellow) is created upstream to the T junction and spacing  
36 channel which evacuates all the waste and debris during priming of the system. It is blocked  
37 when the operation starts. We found that this strategy avoids most of the clogging issue despite  
38 of the critical dimension in T junction (i.e., 11  $\mu\text{m}$ ). The structure within the grey dotted box is  
39 zoomed-in in Fig.S1b and c. An expansion angle A is deployed at the end of the T junction outlet  
40 to limit the duration of cell squeezing. This expansion is not necessary for the cell triggered  
41 splitting (CTS) function as we also observed the CTS on T junctions without this expansion i.e.,  
42 with a straight channel until the end.

43  
44 Eq.1 is a geometrical design rule for designing a T junction that is capable of the capillary  
45 instability leading to lateral breakup (LB) and thus CTS, which is a prerequisite for the method  
46 we show in this study.<sup>34</sup> For any (deformable) object to be encapsulated, the design of geometry  
47 includes the following steps: first,  $w_o$  is chosen to be slightly smaller than the target object size.  
48 For relatively more rigid objects, the dimension difference between the object size and the  $w_o$   
49 can be smaller. Then, the width ratio ( $\frac{w_i}{w_o}$ ) and aspect ratio ( $\frac{w_i}{h}$ ) can be chosen according to Eq.1  
50 and according to the throughput requirement. A rare cell sample normally has small sample  
51 volume and might require a lower flow rate, while large sample might prefer a higher  
52 throughput. In the main text, we show that throughput can be adjusted by merely changing the  
53 operational flow condition along the transition flow conditions. In addition to that we also found  
54 that geometry can alter the position of the transition boundary<sup>34</sup>, thus determining the bounded  
55 effective throughput range within which the flow condition can make an adjustment. Indeed, we  
56 found that the critical flowrates at which the breakup regimes start to change is influenced  
57 slightly by the expansion angle A, constriction channel length N, but significantly by the width  
58 ratio ( $\frac{w_i}{w_o}$ ) and aspect ratio ( $\frac{w_i}{h}$ ). A general rule is that increasing one or both of the ratio(s) would  
59 push the transition to happen at higher flowrates, and thus operating with higher throughput. This  
60 is an important factor when considering the design of the geometry for different applications. In  
61 this study, we used a T junction  $A = 4^\circ$ ,  $N = 50 \mu\text{m}$ ,  $w_i = 30\mu\text{m}$ ,  $w_o = 10\mu\text{m}$  and  $h =$   
62  $52 \mu\text{m}$  for encapsulation experiment with HT-29 cells. We used a T junction with  $A = 4^\circ$ ,  
63  $N = 250 \mu\text{m}$ ,  $w_i = 120\mu\text{m}$ ,  $w_o = 55\mu\text{m}$  and  $h = 180 \mu\text{m}$  for encapsulation experiment  
64 with the 10x genomics bead.

$$66 \quad \beta = 2 \frac{w_i/w_o}{1 + \frac{w_i}{h} + \sqrt{\left[ \left(1 - \frac{w_i}{h}\right)^2 + \pi \frac{w_i}{h} \right]}} > 1 \quad (1)$$

67  
68 Now we explain the simple procedures to determine the operational condition. First, determine a  
69 suitable flow rate for the cell medium (inlet 1) according to the sample volume; second,

70 gradually increase the oil flow rates of the inlet 2 and 3 until the transition from LB to CB  
71 occurs, this flow condition is the operational condition. Many operational conditions are possible  
72 and thus it is easy to find one. No need to determine a full regime map prior to the use of the  
73 chip. Once the operational condition is empirically pre-determined, it can be directly applied  
74 during the formal experiment.

#### 77 Section 2: Single cell triggering process

78 To illustrate the process of CTS, we used a high-speed camera to capture the different breakup  
79 procedures experienced by the two types of mother droplets - empty droplets and single cell  
80 containing droplets- at the same flow condition and on the same geometry (Fig.S2). Take the  
81 moment when the droplet rear interface has fully entered the outlet channel as time zero, at  $T =$   
82  $20\text{ ms}$ , an empty droplet finishes breaking centrally; for a cell loaded droplet however, no sign of  
83 central breakup occurs at  $T = 20\text{ ms}$ , due to the retardation of the cell at the junction; until  $T =$   
84  $27\text{ ms}$  the lateral breakup has happened, with a droplet interface splitting in one arm of the T  
85 junction, generating the satellite droplet around the junction area, where the cell resides, thus  
86 encapsulating the cell automatically.

#### 89 Section 3: Cell triggering efficiency @ 241 Hz

90 We summarize the single cell triggering efficiency at throughput of 241Hz as shown in Fig.S3.  
91 While the triggering efficiency for cells smaller than or similar to the outlet channel width  $w_o$   
92 ( $w_o = 11\mu\text{m}$ ) is not as sufficient as @ 47 Hz, the triggering efficiency for cells that are equal to  
93 or larger than  $12\mu\text{m}$  remains  $> 95\%$ . This indicates a highly selective triggering with a cutoff  
94 triggering threshold at  $12\mu\text{m}$ , i.e., at a cell size slightly larger than  $w_o$ . Such knowledge can be  
95 used to design a chip for either full population encapsulation, i.e., redesigning of a  $w_o$  that is  
96 smaller than the full-size spectrum of the cell population, or a size-selective encapsulation, i.e.,  
97 redesigning of a  $w_o$  that is only smaller than the size of target cells but similar to or larger than  
98 the rest of the cell population.

100 At throughput of 3100 Hz, due to the difficulties in assessing the cell size limited by the image  
101 quality, the triggering efficiency at different cell size range cannot be obtained. However, the  
102 overall triggering efficiency is close to Fig.S3. We could assume the same triggering threshold is  
103 playing a role.

#### 106 Section 4: Droplet size distribution

107 The droplet size distribution for both experiments at 47Hz and at 241 Hz are shown in in Fig.S4.

#### 110 Section 5: Self correction

111 Here we show a typical encapsulation process for a mother droplet containing two cells. When  
112 the two cells are separated from each other within the droplet, the front cell is pushed through the  
113 junction while only the second cell is encapsulated in the satellite droplet. As a result, the  
114 doublets are self-corrected during the process of CTS.

116 Note, if the two cells are adherent to each other, the junction cannot separate them, and the two  
117 cells are encapsulated together (as a single object) into the same satellite droplet.  
118  
119  
120  
121

122 **Supplementary figures**

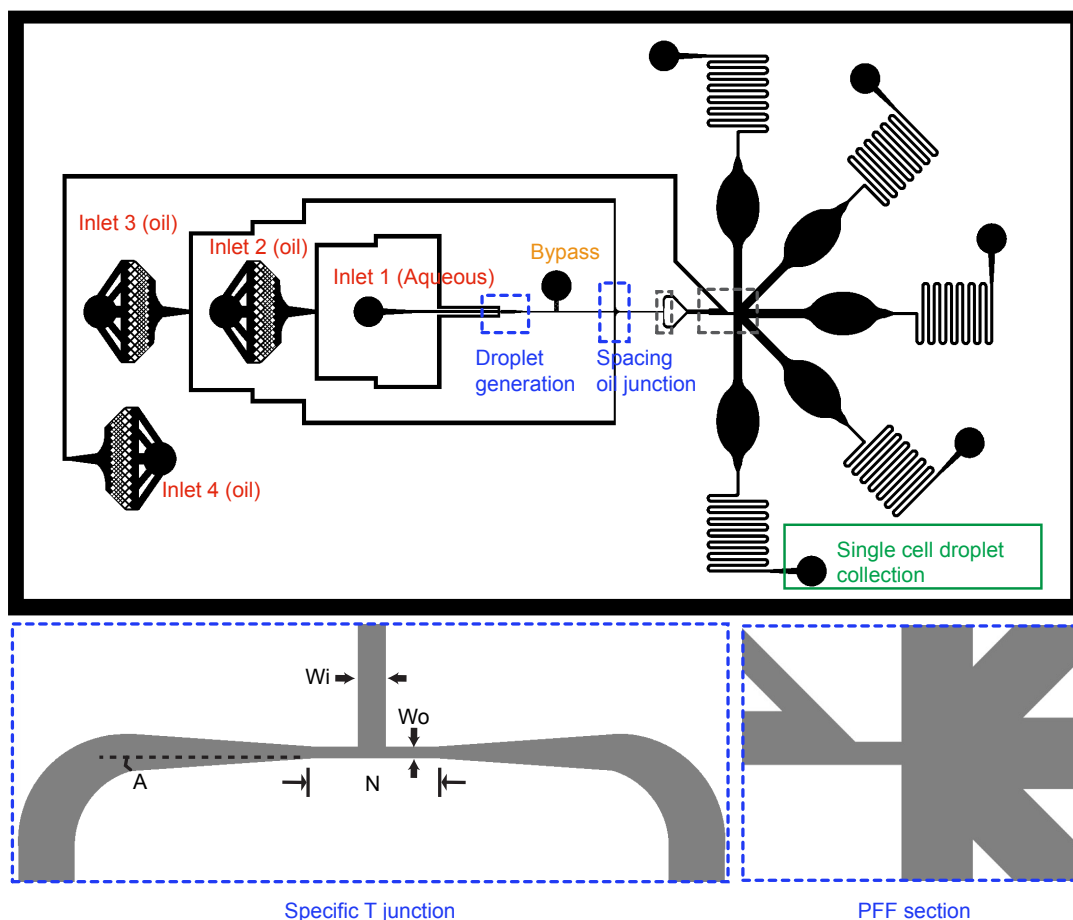

123

124 **Fig. S1.**

125 **The chip design presentation and definition of parameters.** The inlets are shown in red; the  
126 blue dotted boxes show the different microfluidics units, including droplet generation, droplet  
127 spacing, specific T junction (bottom panel, zoomed-in of the grey dotted box) and PFF (bottom  
128 panel, zoomed-in of the grey dotted box).  
129

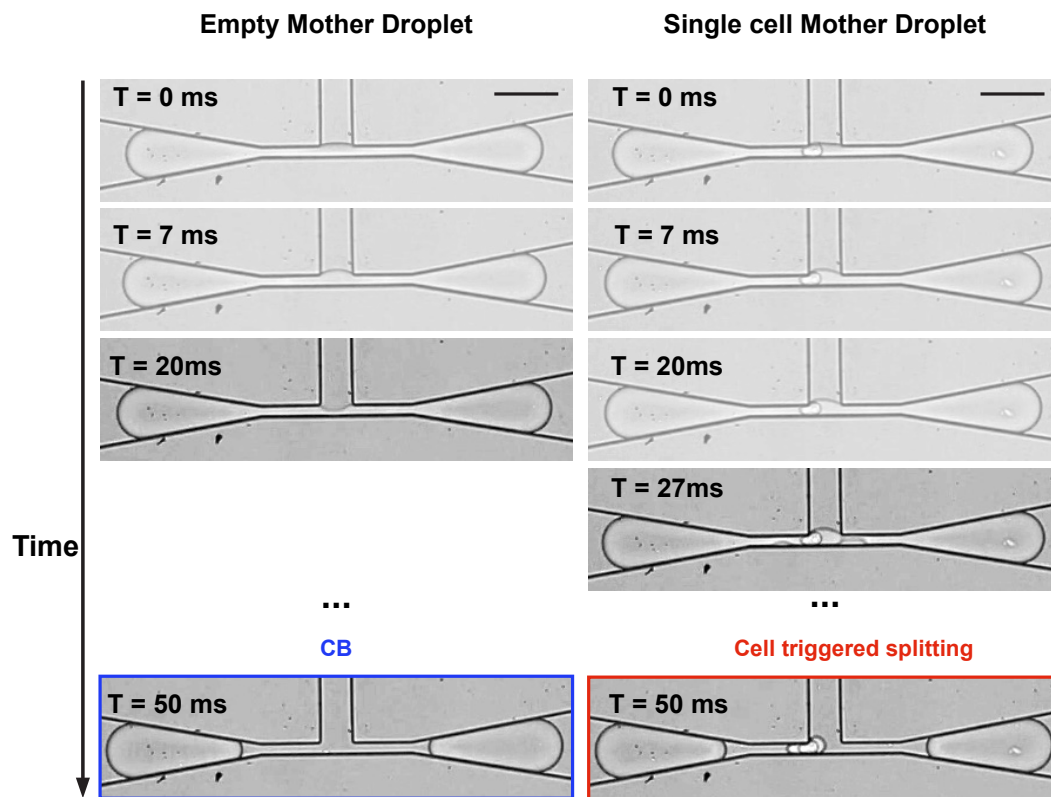

130

131 **Fig. S2.**

132 **The Cell triggered Differential Splitting.** Time sequences of two breakup events. For single  
 133 cell containing mother droplet, the central breakup does not happen at  $T = 20\text{ ms}$  as for the  
 134 empty droplet; at  $T = 27\text{ ms}$ , the lateral breakup process is completed. The bottom panels show  
 135 the final breakup results. Scale bar =  $60\text{ }\mu\text{m}$ .  
 136

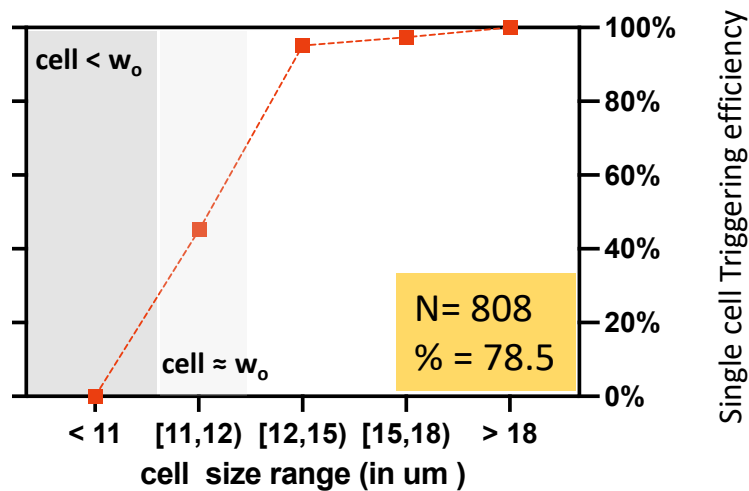

137

138 **Fig. S3.**

139 **Single cell triggering efficiency at different cell size categories obtained @ 241Hz.** The cell  
 140 size range for each cell size category is shown in the x axis; the cell triggering efficiency for each  
 141 category is shown in the y axis; the yellow box indicates total cell number and the overall  
 142 triggering efficiency for the total cell population.

143

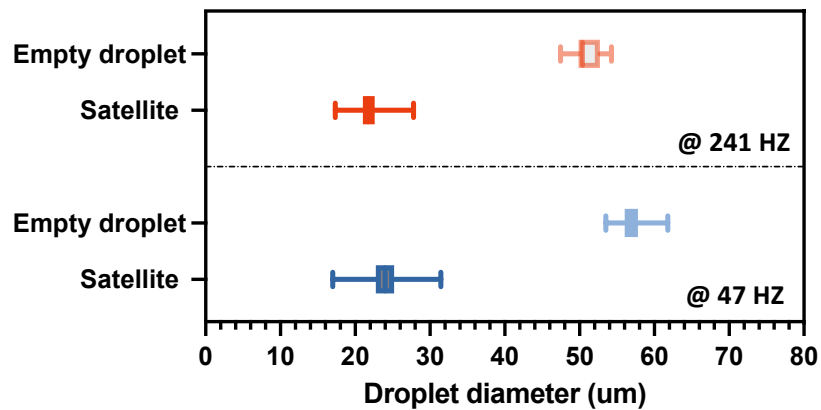

144

145 **Fig. S4.**

146 **The droplet size distribution @ 241Hz and @ 47Hz.** The min and max values are shown as  
 147 the whiskers, the 1st and 3rd quartiles are shown in box, with median show as the darker line  
 148 inside the box.

149

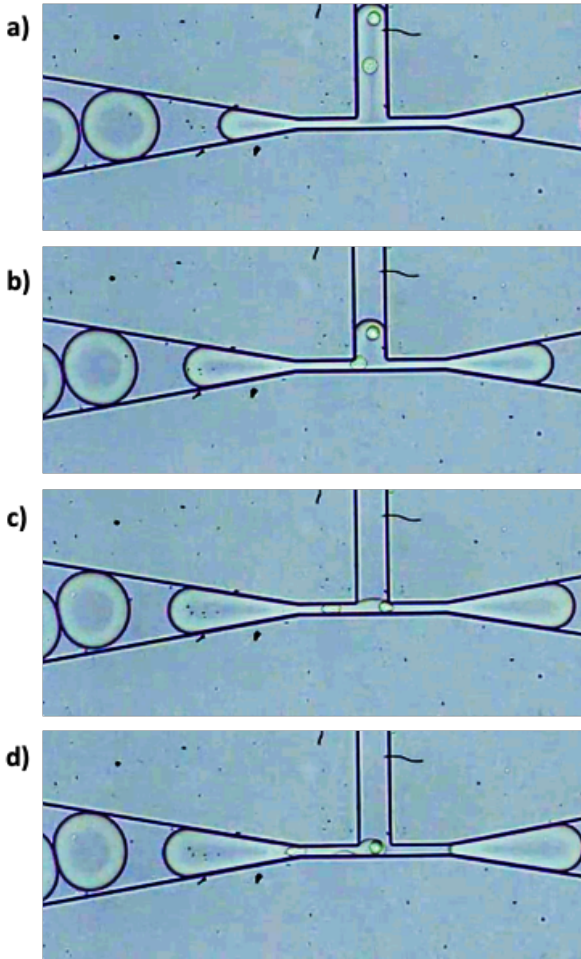

150

151 **Fig S5.**

152 The time sequence of a droplet splitting event with two cells.

153

154

155

156

157 **Movie S1**

158 **Slow motion\_Cell Triggered Splitting. mov**

159 Example of four droplet splitting events (two empty and two with a single cell) taken by the  
160 high-speed camera under a framerate of 3,000 FPS.

161

162

163

164
